# Supplementary material for: Examining the Mechanisms of Therapeutic Change in a Cognitive-Behavioral Intervention for Anxious Children: The Role of Interpretation Bias, Perceived Control, and Coping Strategies
Source: Springer Nature journal article supplement (doi:10.1007/s10578-017-0731-2), 2017-05-12
Supplement: MOESM1 [file 12283878]

| Variable | 1 | 2 | 3 | 4 | 5 | 6 | 7 | 8 |
| --- | --- | --- | --- | --- | --- | --- | --- | --- |
| 1. Generalized Anxiety-SCARED-R 2. Separation Anxiety-SCARED-R 3. Specific Phobia-SCARED-R 4. Social Phobia-SCARED-R 5. Perceived control- ACQ-C | -  -  -  -  - | .28  -  -  -  - | .47***  .57***  -  -  - | .31*  .25  .41**  -  - | -.21  -.02  -.30*  -.32*  -- | .35*  .27  .41**  .20  -.44** | .05  .04  .39**  .14  -.22 | .22  .04  .18  .03  -.12 |
| 1. Interpretation bias- ASQ-C | - | - | - | - | - | - | .34** | .04 |
| 1. Avoidance ASQ-C | - | - | - | - | - | - | - | .01 |
| 1. Positive coping- ASQ-C | - | - | - | - | - | - | - | - |

**Supplementary Material**

Table 1. Correlation between Study Variables in Pretreatment Assessment

* *Note*. SCARED- R = Screen of Child Anxiety Related Emotional Disorders-Revised; ASQ-C = Ambiguous Situation Questionnaire for Children, ACQ-C-SF = Anxiety Control Questionnaire for Children, Short Form. * *p* < 0.05, ** *p* < 0.01, *** *p* < 0.001

Table 2. Correlation between Study Variables in In-treatment Assessment

* *Note*. SCARED- R = Screen of Child Anxiety Related Emotional Disorders-Revised; ASQ-C = Ambiguous Situation Questionnaire for Children, ACQ-C-SF = Anxiety Control Questionnaire for Children, Short Form. * *p* < 0.05, ** *p* < 0.01, *** *p* < 0.001

| Variable | 1 | | 2 | | 3 | | 4 | | 5 | | 6 | | 7 | | 8 | |
| --- | --- | --- | --- | --- | --- | --- | --- | --- | --- | --- | --- | --- | --- | --- | --- | --- |
| 1. Generalized Anxiety-SCARED-R 2. Separation Anxiety-SCARED-R 3. Specific Phobia-SCARED-R 4. Social Phobia-SCARED-R 5. Perceived control- ACQ-C | | | -  -  -  -  - | | .36*  -  -  -  - | | ..38**  .60***  -  -  - | | .26  .47***  .41**  -  - | | -.29*  -.33**  -.37*  -.58***  - | | .58***  .34**  .49***  .28  -.11 | | .10  .12  .44**  -.01  .05. | | -.08  .13  -.05  .13  .20 | |
| 1. Interpretation bias- ASQ-C | | | - | | - | | - | | - | | - | | - | | .26 | | .05 | |
| 1. Avoidance ASQ-C | | | - | | - | | - | | - | | - | | - | | - | | -.20 | |
| 1. Positive coping- ASQ-C | | | - | | - | | - | | - | | - | | - | | - | | - | |

Table 3. Correlation between Study Variables in Post-treatment Assessment

| Variable | 1 | 2 | 3 | 4 | 5 | 6 | 7 | 8 |
| --- | --- | --- | --- | --- | --- | --- | --- | --- |
| 1. Generalized Anxiety-SCARED-R 2. Separation Anxiety-SCARED-R 3. Specific Phobia-SCARED-R 4. Social Phobia-SCARED-R 5. Perceived control- ACQ-C | -  -  -  -  - | .32*  -  -  -  - | .42**  .32*  -  -  - | .42**  .23  .46***  -  - | -.24  -.14  -.41**  -.33*  - | .25  .09  .33*  .16  .11 | -.36  -.03  -.24  -.15  -.07 | -.08  47***  .08  .02  -.02 |
| 1. Interpretation bias- ASQ-C | - | - | - | - | - | - | .10 | .16 |
| 1. Avoidance ASQ-C | - | - | - | - | - | - | - | .11 |
| 1. Positive coping- ASQ-C | - | - | - | - | - | - | - | - |

* *Note*. SCARED- R = Screen of Child Anxiety Related Emotional Disorders-Revised; ASQ-C = Ambiguous Situation Questionnaire for Children, ACQ-C-SF = Anxiety Control Questionnaire for Children, Short Form. * *p* < 0.05, ** *p* < 0.01, *** *p* < 0.001

Table 4. Correlation between Study Variables in 4 month Follow-up Assessment

| Variable | 1 | 2 | 3 | 4 | 5 | 6 | 7 | 8 |
| --- | --- | --- | --- | --- | --- | --- | --- | --- |
| 1. Generalized Anxiety-SCARED-R 2. Separation Anxiety-SCARED-R 3. Specific Phobia-SCARED-R 4. Social Phobia-SCARED-R 5. Perceived control- ACQ-C | -  -  -  -  - | .39**  -  -  -  - | .39**  .45***  -  -  - | .51***  .16  .27  -  - | -.42**  -.22  -.24  -.27  - | .33*  .34*  .30*  .01  -.03 | .04  .25  .29*  -.11  -.12 | .07  .15  .27  .16  -.17 |
| 1. Interpretation bias- ASQ-C | - | - | - | - | - | - | .38** | -.02 |
| 1. Avoidance ASQ-C | - | - | - | - | - | - | - | .08 |
| 1. Positive coping- ASQ-C | - | - | - | - | - | - | - | - |

* *Note*. SCARED- R = Screen of Child Anxiety Related Emotional Disorders-Revised; ASQ-C = Ambiguous Situation Questionnaire for Children, ACQ-C-SF = Anxiety Control Questionnaire for Children, Short Form. * *p* < 0.05, ** *p* < 0.01, *** *p* < 0.001
